# Supplementary material for: Knockdown of lncRNA NEAT1 expression inhibits cell migration, invasion and EMT by regulating the miR-24-3p/LRG1 axis in retinoblastoma cells
Source: PubMed Central journal article supplement — Exp Ther Med. 2021 Feb 18;21(4):367. doi: 10.3892/etm.2021.9798 (PMC7903428; doi:10.3892/etm.2021.9798), 2021-02-18

Figure S1. Transfection efficiency of pcDNA-NEAT1, miR-24-3p, anti-miR-24-3p and pcDNA-LRG1. (A) Expression of NEAT1 in Y79 and WERI-RB1 cells transfected with pcDNA or pcDNA-NEAT1 was determined via RT-qPCR. \*\*\* $P < 0.001$  vs. pcDNA. (B) Expression of miR-24-3p in Y79 and WERI-RB1 cells transfected with miR-NC or miR-24-3p was determined by RT-qPCR. \*\*\* $P < 0.001$  vs. miR-NC. (C) Expression of miR-24-3p in Y79 and WERI-RB1 cells transfected with anti-NC or anti miR-24-3p was determined by RT-qPCR and \*\*\* $P < 0.001$  vs. anti-NC. (D) Protein expression of LRG1 in Y79 and WERI-RB1 cells transfected with pcDNA or pcDNA-LRG1 was determined via western blotting. \*\*\* $P < 0.001$  vs. pcDNA. miR, microRNA; NEAT1, nuclear paraspeckle assembly transcript 1; NC, negative control; RT-qPCR, reverse transcription-quantitative PCR; LRG1, leucine-rich  $\alpha$ -2-glycoprotein.

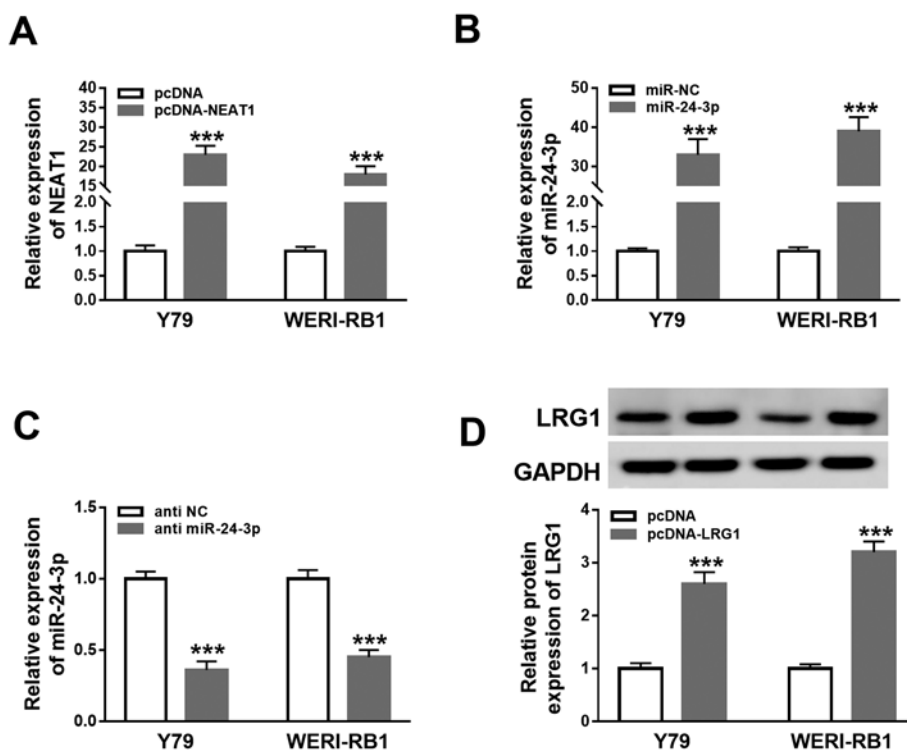

Supplement: Supplementary_Data.pdf [file Supplementary_Data.pdf]
